# Supplementary material for: REV-ERBα mediates complement expression and diurnal regulation of microglial synaptic phagocytosis
Source: eLife journal article supplement (doi:10.7554/elife.58765), 2020-12-01
Supplement: supp [file elife-58765-supp-v1.zip]

Archive with 13 entries (13 files):
- elife_poa_e58765_Transparent_Reporting_File.docx
- elife_poa_e58765_Figure_1_figure_supplement_1.pdf
- elife_poa_e58765_Figure_1_figure_supplement_2.pdf
- elife_poa_e58765_Figure_2_figure_supplement_1.pdf
- elife_poa_e58765_Figure_3_figure_supplement_1.pdf
- elife_poa_e58765_Figure_3_figure_supplement_2.pdf
- elife_poa_e58765_Figure_3_figure_supplement_3.pdf
- elife_poa_e58765_Figure_4_figure_supplement_1.pdf
- elife_poa_e58765_Figure_4_figure_supplement_2.pdf
- elife_poa_e58765_Figure_1_source_data_1.xlsx
- elife_poa_e58765_Figure_2_source_data_1.xlsx
- elife_poa_e58765_Figure_3_source_data_1.xlsx
- elife_poa_e58765_Figure_4_source_data_1.xlsx
