# Supplementary material for: REV-ERBα mediates complement expression and diurnal regulation of microglial synaptic phagocytosis
Source: eLife journal article supplement (doi:10.7554/elife.58765), 2020-12-01
Supplement: supp [file elife-58765-supp-v1.zip › elife_poa_e58765_Figure_1_source_data_1.xlsx]

## Sheet: Sheet1
Source Data, Griffin et al. eLife.				FIGURE 1
Fig. 1A									Nestin			Nestin
	WT	WT	WT	RKO	RKO	RKO	BMKO	BMKO	Cre-	Cre-	Cre-	Cre+	Cre+	Cre+
C4b	0.938529	1.25402	0.807453	3.19887	9.50217	7.52013	11.116	12.4706	1.05853	1.20054	0.740934	4.69812	5.44102	4.19654
C3	0.956135	0.893054	1.15081	2.36551	3.41297	2.16211	2.91471	3.09093	0.705744	0.973822	1.32043	1.06548	0.934328	1.60269
C1qa	1.24683	0.616538	1.13663	1.56652	3.3698	2.16245	1.70807	0.691578	0.823571	1.05663	1.1198	0.95977	0.820448	0.979657
C1qb	1.32064	0.536274	1.14309	1.26957	2.85707	1.79469	1.47942	0.637913	0.817059	1.08534	1.0976	0.991256	0.801365	0.835141
C1qc	1.09749	0.929168	0.973338	1.12546	2.91584	1.68881	1.51184	1.36984	0.96418	0.974783	1.06104	1.13079	1.07585	1.08519
C1qra	1.1927	0.915727	0.891578	1.63453	3.3032	2.48124	1.71742	1.16229	1.36567	0.89277	0.74156	1.4763	1.839	1.43512
C4bp	0.642183	1.40385	0.953969	1.47397	2.42174	3.03425	1.27007	1.48584	0.998087	1.00131	1.00061	2.34436	1.54173	1.74806
Sirpa	0.968191	1.06221	0.969603	0.55381	0.799664	0.695327	0.720097	0.606325	1.22476	0.871096	0.904144	1.2315	1.281	0.9493
Fig. 1B
	WT (Cre-)				Camk2a-iCre+;Bmal1(f/f)
C4b	0.974383	0.943042	1.15682	0.925752	5.65519	3.52563	6.97481
C3	0.980179	1.72293	0.918453	0.378441	1.25149	1.33997	0.305745
Fig. 1C
	WT (Cre-)					Aldh1l1-CreER+;Bmal1(f/f)
C4b	1.13306	1.17334	0.765185	0.910046	1.01837	2.20587	1.37077	1.7031	1.38367	1.50875
C3	0.243962	2.02727	0.131107	0.17976	2.4179	0.750616	4.17047	1.19528	0.224608	0.787377
Fig. 1D
			WT (Cre-)						Cx3cr1-CreER+;Bmal1(f/f)
C4b	1.13882	0.763764	0.81001	1.82515	0.715802	0.746458	0.853571	0.835631	0.83033	1.12582	0.855193	0.951071	0.875886	1.03934
C3	1.09649	2.084	0.308358	0.521663			0.45933	2.20684	1.31791	2.23194	0.722075	0.510552	0.742293	0.796893
Fig. 1E
			AAV-GFP					AAV-Cre
Nr1d1	0.956674	0.918753	0.864276	0.888969	1.08032	1.28231	0.282624	0.300052	0.247768	0.274815
Fabp7	1.08964	1.04906	1.04723	0.836529	0.947946	1.0299	3.11402	2.5881	2.58396	2.50783
C4b	1.32686	1.0307	0.798857	0.654708	0.904163	1.28357	2.16937	2.29862	1.91561	2.63422
C3	0.772863	1.14805	0.835004	1.16841	1.07944	0.996231	1.14941	0.65021	0.672087	0.835706
Fig. 1F
					WT									RKO
C4b	2.03987	0.228446	1.36809	0.709377	0.922533						2.40999	8.53404	6.75353	5.90433	8.83645
C3	1.42859	0.880901	0.690508	0.632457	1.33793	1.02961	1	0.74369	0.694161	1.56074	1.65379	3.52217	8.2373	9.15457	4.70389	2.06625	3.965
