# Supplementary material for: REV-ERBα mediates complement expression and diurnal regulation of microglial synaptic phagocytosis
Source: eLife journal article supplement (doi:10.7554/elife.58765), 2020-12-01
Supplement: supp [file elife-58765-supp-v1.zip › elife_poa_e58765_Figure_2_source_data_1.xlsx]

## Sheet: Sheet1
Source Data, Griffin et al, eLife				FIGURE 2
Fig. 2F
Normalized Synaptophysin-Iba1-Cd68 coloc. Volume
	WT	RKO
	1.97124	46.5417
	0.860065	9.63962
	1.23984	1.6371
	0.648975	24.9933
	0.0416153	24.8989
	1.23826	25.7939
	1.42857	0.754579
	0.571429	3.53114
	0.501946	2.3463
	1.31907	11.6498
	1.17899	9.21448
	1.57103	2.20613
	1.0585
	0.32312
	1.04735
Fig. 2I	Average presynaptic terminals
	engulfed by microglia
	WT	RKO
	8.17	16.38
	10.2	20.27
	5.33	18.64
	5.33	19.25
