# Supplementary material for: REV-ERBα mediates complement expression and diurnal regulation of microglial synaptic phagocytosis
Source: eLife journal article supplement (doi:10.7554/elife.58765), 2020-12-01
Supplement: supp [file elife-58765-supp-v1.zip › elife_poa_e58765_Figure_3_source_data_1.xlsx]

## Sheet: Sheet1
Source data- Griffin et al, eLife				FIGURE 3
Fig. 3A	Normalized Synaptophysin Volume				Fig. 3D	Avg. synapses/image/mouse
	WT	RKO				WT	RKO
	0.489701	0.300974				27.732	13.786
	0.775411	0.306911				27.321	13.679
	0.671112	0.211495				23.393	8.125
	1.03619	0.0714909				45.933	7.518
	0.833157	0.0818188
	2.19443	0.109863
	0.695311	0.248364			Fig. 3G	Normalized Synaptophysin Volume
	0.963528	0.231719				WT	RKO
	1.23231	0.2314				1.01212	0.209322
	0.760982	0.307312				0.761013	0.163087
	1.5519	0.0998377				0.989428	0.201916
	1.70018	0.268044				1.13298	0.173142
	1.56735					0.957106	0.210384
	0.24					1.14735	0.0637444
	0.288434
Fig. 3B	Normalized Homer1 Volume
	WT	RKO
	0.761174	0.346625
	1.14234	0.639617
	1.08261	0.204483
	0.249289	0.274354
	1.0471	0.0558668
	1.7175	0.105513
	0.878422	0.10057
	2.69808	0.705931
	0.598422	0.21081
	0.401746	1.02624
	2.31985	0.405445
	1.2895	0.368656
	0.267218
	0.218872
	0.327887
Fig. 3C	Normalized Coloc. Synaptophysin-Homer1 Volume
	WT	RKO
	0.371895	0.460524
	1.16867	0.00688482
	1.01979	0.209406
	0.143498	0.0625293
	1.20522	0.107642
	2.09093	0.153006
	0.88937	0.177653
	2.69586	0.0562569
	0.574993	0.0743125
	0.354552	0.739932
	2.48465	0.130047
	1.36474	0.174751
	0.476529
	0.0731514
	0.0861561
