# Supplementary material for: REV-ERBα mediates complement expression and diurnal regulation of microglial synaptic phagocytosis
Source: eLife journal article supplement (doi:10.7554/elife.58765), 2020-12-01
Supplement: supp [file elife-58765-supp-v1.zip › elife_poa_e58765_Figure_4_source_data_1.xlsx]

## Sheet: Sheet1
Source data- Griffin et al, eLife				FIGURE 4
Fig. 4C	Norm. Iba1-CD68-Synaptophysin Volume
	WT AM	WT PM	RKO AM	RKO PM
	1.97124	4.82609	46.5417	17.3413
	0.860065	0.673425	9.63962	12.9783
	1.23984	7.77251	1.6371	7.31146
	0.648975	2.29408	24.9933	7.6438
	0.0416153	10.3881	24.8989
	1.23826	1.86184	25.7939
			0.754579
			3.53114
			2.3463
			11.6498
			9.21448
			2.20613
Fig. 4F	Average presynaptic terminals
	engulfed by microglia
	WT AM	WT PM
	8.17	14.78
	10.2	16.38
	5.33	16.67
	5.33	17
