# Supplementary material for: REV-ERBα mediates complement expression and diurnal regulation of microglial synaptic phagocytosis
Source: eLife journal article supplement (doi:10.7554/elife.58765), 2020-12-01
Supplement: supp [file elife-58765-supp-v1.zip › elife_poa_e58765_Transparent_Reporting_File.docx]

***eLife’s* transparent reporting form**

We encourage authors to provide detailed information *within their submission* to facilitate the interpretation and replication of experiments. Authors can upload supporting documentation to indicate the use of appropriate reporting guidelines for health-related research (see [EQUATOR Network](http://www.equator-network.org/%20)), life science research (see the [BioSharing Information Resource](https://biosharing.org/)), or the [ARRIVE guidelines](http://www.plosbiology.org/article/info:doi/10.1371/journal.pbio.1000412) for reporting work involving animal research. Where applicable, authors should refer to any relevant reporting standards documents in this form.

If you have any questions, please consult our Journal Policies and/or contact us: [editorial@elifesciences.org](mailto:editorial@elifesciences.org).

**Sample-size estimation**

- You should state whether an appropriate sample size was computed when the study was being designed
- You should state the statistical method of sample size computation and any required assumptions
- If no explicit power analysis was used, you should describe how you decided what sample (replicate) size (number) to use

Please outline where this information can be found within the submission (e.g., sections or figure legends), or explain why this information doesn’t apply to your submission:

We did not use an explicit power analysis to calculate the sample size, as we did not have detailed preliminary data using this method in our lab prior to beginning the study. Rather, we based our sample sizes on Schafer DP et al, *Neuron*, 2012, DOI: 10.1016/j.neuron.2012.03.026, as similar methodologies were used in this study. The information on sample numbers can be found in the associated legend for each figure.

**Replicates**

- You should report how often each experiment was performed
- You should include a definition of biological versus technical replication
- The data obtained should be provided and sufficient information should be provided to indicate the number of independent biological and/or technical replicates
- If you encountered any outliers, you should describe how these were handled
- Criteria for exclusion/inclusion of data should be clearly stated
- High-throughput sequence data should be uploaded before submission, with a private link for reviewers provided (these are available from both GEO and ArrayExpress)

Please outline where this information can be found within the submission (e.g., sections or figure legends), or explain why this information doesn’t apply to your submission:

In this paper a biological replicate is generally defined as data from a single mouse. or a well in the case of cell culture experiments. Technical replicates are defined as a data point obtained from several images/section derived from a mouse, which were averaged. One exception is electron microscopy, in which each image taken was consider a biological. These images were derived from 2 mice/genotype, which is clear in the figures. For qPCR, duplicate or triplicate technical replicates were run for each sample. This information can be found in the figure legends with technical replicates denoted by “n” and biological replicates denoted by “N”. The information about EM is in the Figure Legend, where datapoints from each originating mouse have a unique color.

**Statistical reporting**

- Statistical analysis methods should be described and justified
- Raw data should be presented in figures whenever informative to do so (typically when N per group is less than 10)
- For each experiment, you should identify the statistical tests used, exact values of N, definitions of center, methods of multiple test correction, and dispersion and precision measures (e.g., mean, median, SD, SEM, confidence intervals; and, for the major substantive results, a measure of effect size (e.g., Pearson's r, Cohen's d)
- Report exact p-values wherever possible alongside the summary statistics and 95% confidence intervals. These should be reported for all key questions and not only when the p-value is less than 0.05.

Please outline where this information can be found within the submission (e.g., sections or figure legends), or explain why this information doesn’t apply to your submission:

Statistical methods and p-values are described and reported in the figure legends and Methods. Since these experiments primarily compare two groups, we use 2-tailed T-tests with Welch’s correction. Multiple comparison correction using Holm-Sidak method was applied when more than 1 t-test was applied to a given dataset.

(For large datasets, or papers with a very large number of statistical tests, you may upload a single table file with tests, Ns, etc., with reference to sections in the manuscript.)

**Group allocation**

- Indicate how samples were allocated into experimental groups (in the case of clinical studies, please specify allocation to treatment method); if randomization was used, please also state if restricted randomization was applied
- Indicate if masking was used during group allocation, data collection and/or data analysis

Please outline where this information can be found within the submission (e.g., sections or figure legends), or explain why this information doesn’t apply to your submission:

Samples were allocated into experimental groups based on their genotypes. WT and KO mice were raised as littermates mixed together in the same cages. The genotypes are shown in the figures and associated legends. Imaging and image quantification was performed in a manner blinded to genotype.

**Additional data files (“source data”)**

- We encourage you to upload relevant additional data files, such as numerical data that are represented as a graph in a figure, or as a summary table
- Where provided, these should be in the most useful format, and they can be uploaded as “Source data” files linked to a main figure or table
- Include model definition files including the full list of parameters used
- Include code used for data analysis (e.g., R, MatLab)
- Avoid stating that data files are “available upon request”

Please indicate the figures or tables for which source data files have been provided:
