# Supplementary figures and images for: REV-ERBα mediates complement expression and diurnal regulation of microglial synaptic phagocytosis
Source: eLife journal article supplement (doi:10.7554/elife.58765), 2020-12-01

Figure 1- Supplement 1

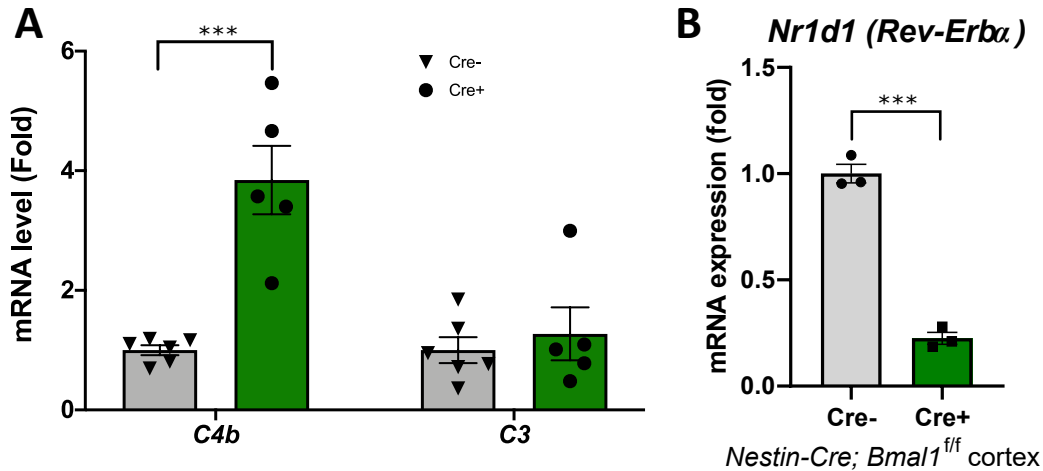

Supplement: supp [file elife-58765-supp-v1.zip › elife_poa_e58765_Figure_1_figure_supplement_1.pdf]

Figure 1- Supplement 2

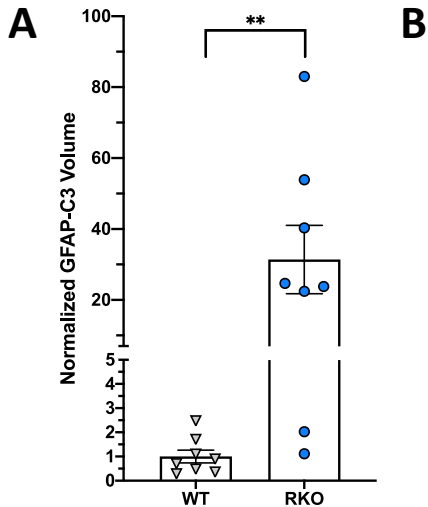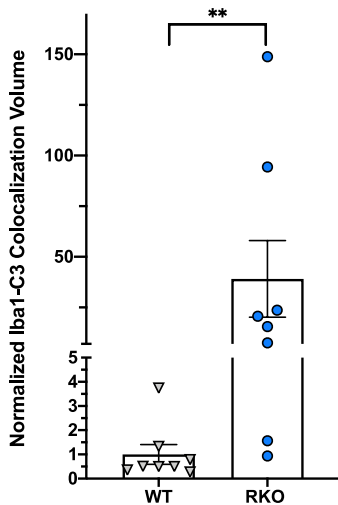

Supplement: supp [file elife-58765-supp-v1.zip › elife_poa_e58765_Figure_1_figure_supplement_2.pdf]

# Figure 2- Supplement 1

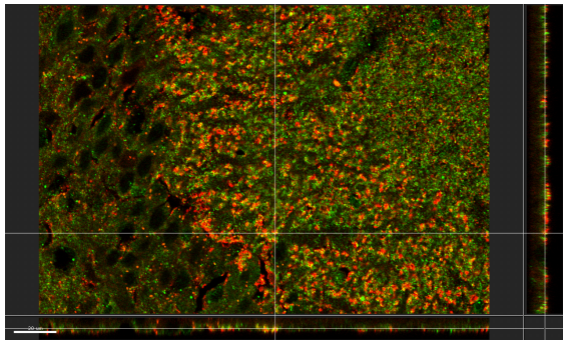

**Synaptophysin**

**Homer1**

Supplement: supp [file elife-58765-supp-v1.zip › elife_poa_e58765_Figure_2_figure_supplement_1.pdf]

Figure 3- Supplement 1

WT AM

RKO AM

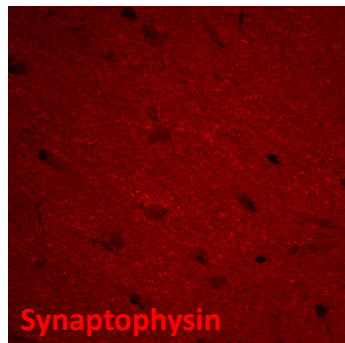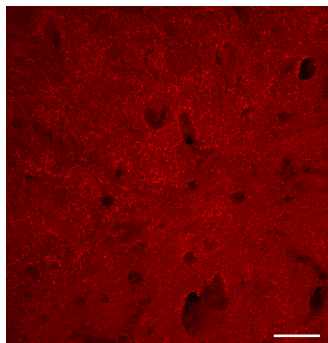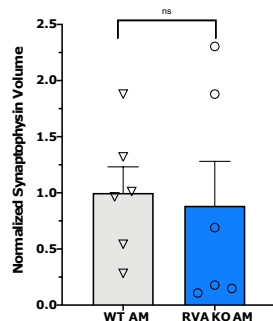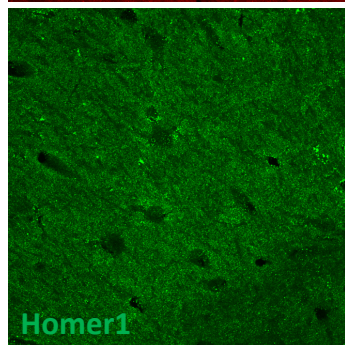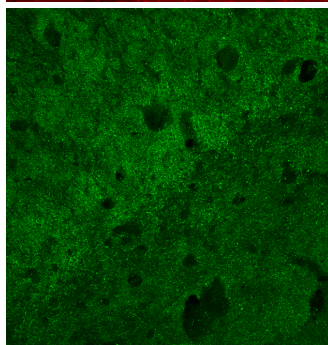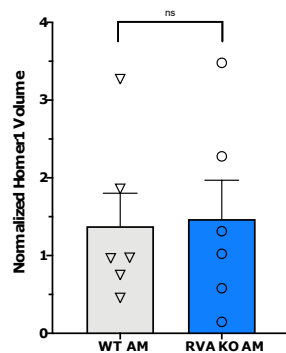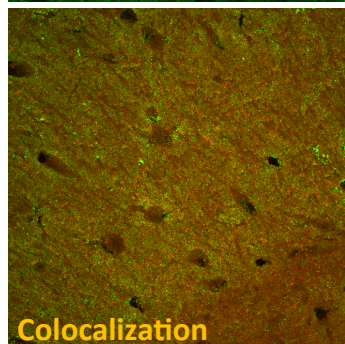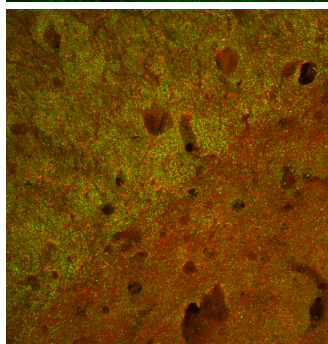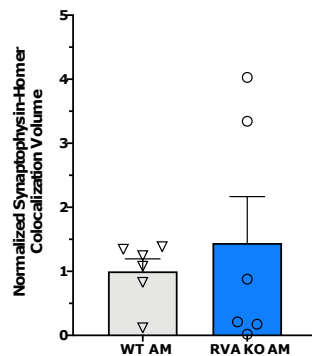

Supplement: supp [file elife-58765-supp-v1.zip › elife_poa_e58765_Figure_3_figure_supplement_1.pdf]

Figure 3-Supplement 2

**A** **WT** **RKO**

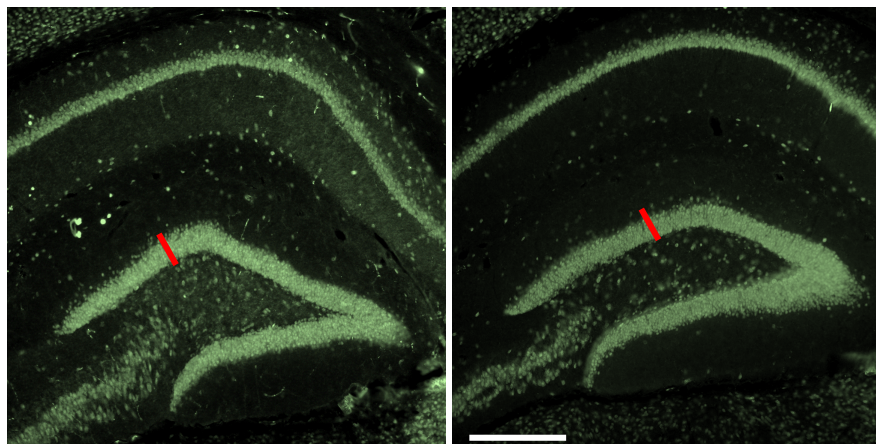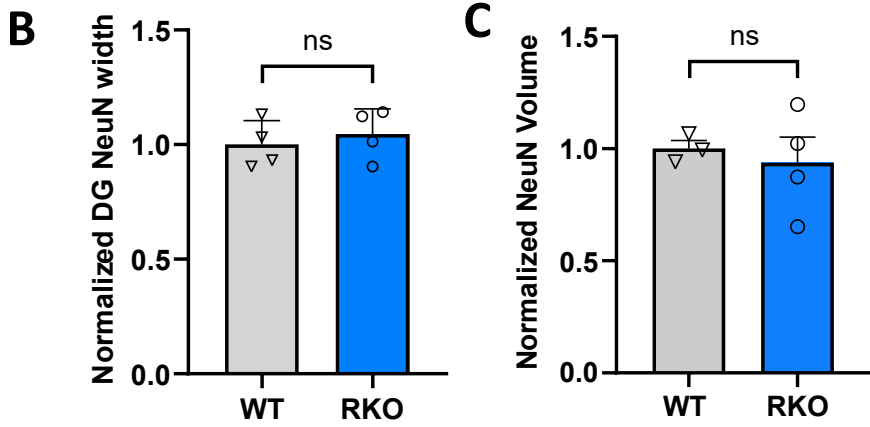

Supplement: supp [file elife-58765-supp-v1.zip › elife_poa_e58765_Figure_3_figure_supplement_2.pdf]

Figure 3-Supplement 3

**WT**

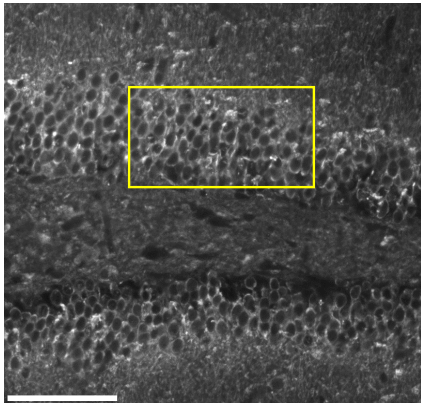

**RKO**

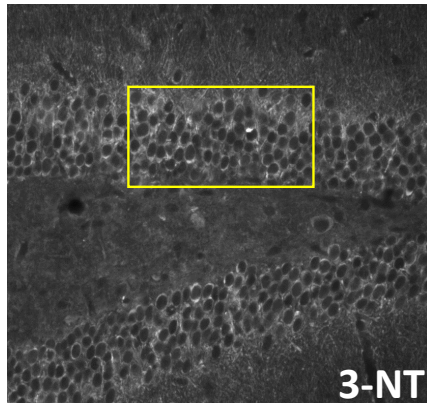

**3-Nitrotyrosine**

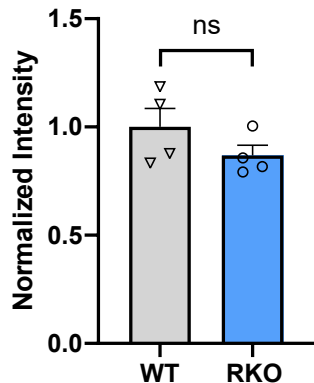

Supplement: supp [file elife-58765-supp-v1.zip › elife_poa_e58765_Figure_3_figure_supplement_3.pdf]

Figure 4-Supplement 1

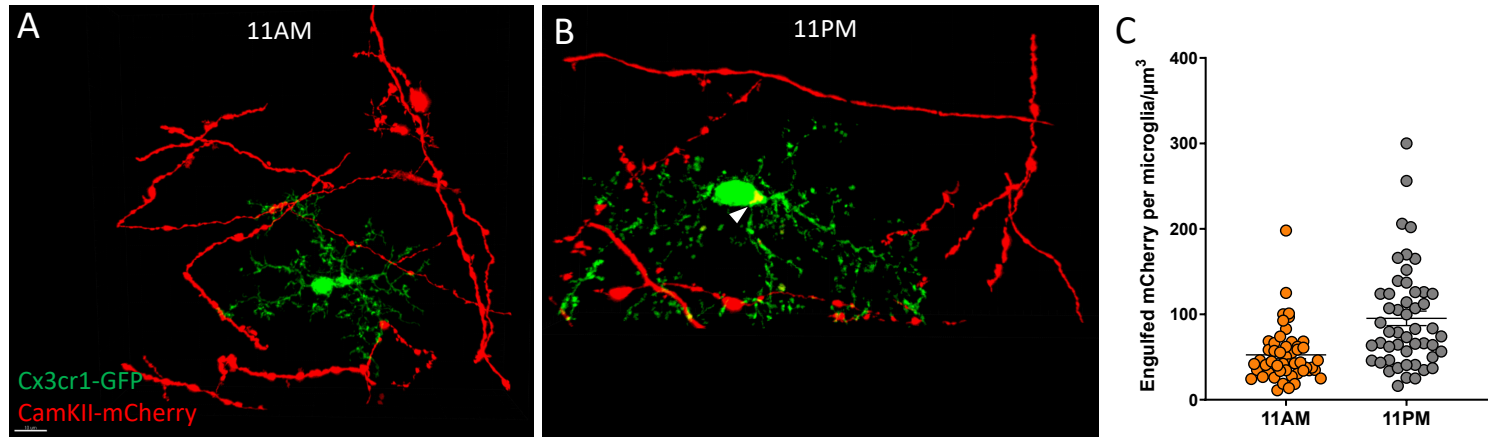

Supplement: supp [file elife-58765-supp-v1.zip › elife_poa_e58765_Figure_4_figure_supplement_1.pdf]

Figure 4- Supplement 2

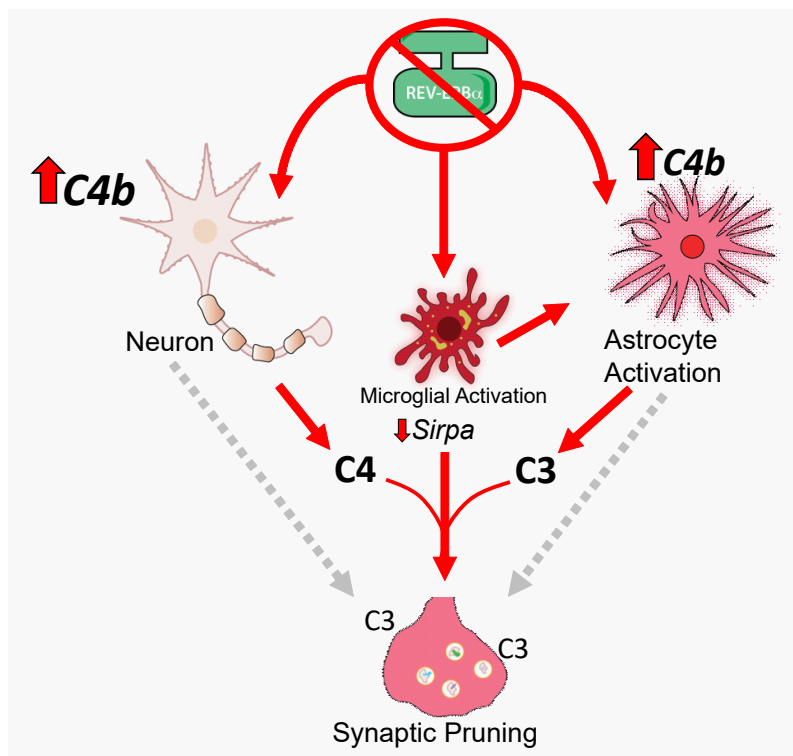

Supplement: supp [file elife-58765-supp-v1.zip › elife_poa_e58765_Figure_4_figure_supplement_2.pdf]
